# Supplementary material for: Desorption of 1,3,5-Trichlorobenzene from Multi-Walled Carbon Nanotubes: Impact of Solution Chemistry and Surface Chemistry
Source: MDPI journal article supplement (doi:10.3390/nano3020289), 2013-05-17

## Supplementary Information

**Table S1.** Physicochemical properties of 1,3,5-TCB \*.

| Compounds | Molecular weight (g/mol) | Solubility (mg/L) | Octanol-water partitioning coefficient (log $k_{ow}$ ) | Henry's law constant (atm·m <sup>3</sup> /mol) |
|-----------|--------------------------|-------------------|--------------------------------------------------------|------------------------------------------------|
| 1,3,5-TCB | 181.45                   | 6.01              | 4.19                                                   | 0.00189                                        |

\* The physical properties of this compound were obtained from the SRC PhysProp Database <http://www.syrres.com/esc/physdemo.htm>.

**Table S2.** Physicochemical properties of MWNTs \*.

| CNTs type         | Non-Functionalized MWNTs      | MWNT-OH                            | MWNT-COOH                            |
|-------------------|-------------------------------|------------------------------------|--------------------------------------|
| Functional Groups | None                          | 5.58 wt.% of –OH (XPS & Titration) | 3.86 wt.% of –COOH (XPS & Titration) |
| Outside diameter  | 5–15 nm (from HRTEM, Raman)   | <7 nm (from HRTEM, Raman)          | <7 nm (from HRTEM, Raman)            |
| Inside diameter   | 3–5 nm                        | 2–5 nm                             | 2–5 nm                               |
| Length            | ~50 $\mu$ m (TEM)             | 0.5–2 $\mu$ m (TEM)                | 10–30 $\mu$ m (TEM)                  |
| SSA               | > 233 m <sup>2</sup> /g (BET) | 500 m <sup>2</sup> /g (BET)        | 500 m <sup>2</sup> /g (BET)          |
| Tap Density       | 0.27 g/cm <sup>3</sup>        | 0.27 g/cm <sup>3</sup>             | 0.27 g/cm <sup>3</sup>               |
| True density      | ~2.1 g/cm <sup>3</sup>        | ~2.1 g/cm <sup>3</sup>             | ~2.1 g/cm <sup>3</sup>               |

\* Source: <http://www.us-nano.com/nanotubes#a4>.

**Figure S1.** (A) molecular structure of 1,3,5-trichlorobenzene; (B) molecular structure of peptone.

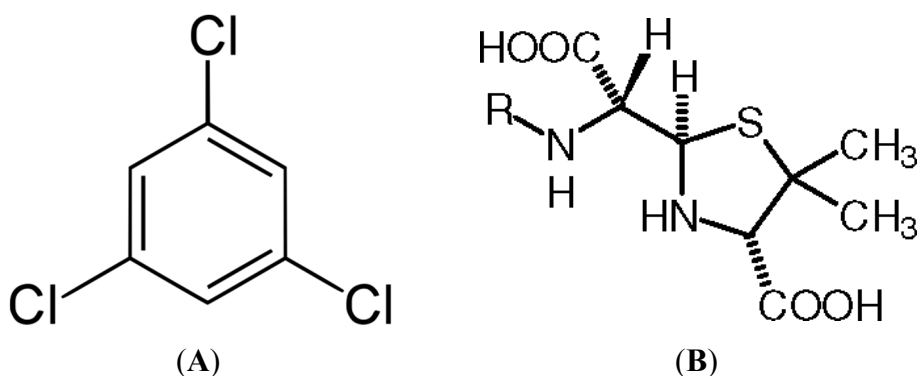

Supplement: s1 [file s1]
